# Supplementary material for: The peroxisome proliferator-activated receptor gamma (PPARγ) agonist, rosiglitazone, ameliorates neurofunctional and neuroinflammatory abnormalities in a rat model of Gulf War Illness
Source: PLoS One. 2020 Nov 13;15(11):e0242427. doi: 10.1371/journal.pone.0242427 (PMC7665704; doi:10.1371/journal.pone.0242427)
Supplement: S1 Data — (XLSX) [file pone.0242427.s001.xlsx]

## Sheet: Table 2
									Splash Test	Splash Test
	Open Field (center)	Rearing	EPM		NOR Index		Coat State		% grooming	Latency		TST Immobility		FST Immobility		Sucrose Preference Test
#7	45	33	18		71.4286		1		11.3333	40		254		196		86.6667
#8	5	46	18		75		0		18.6667	65		269		207		50
#9	19	17	5		87.5		1		15.3333	28		257		182		100
#10	26	42	24		80.5195		2		20.3333	130		277		189		100
#11	31	15	34		47.2727		0		9	58		295		168		80
#12	28	49	7		82.7586		0		3.66667	50		290		170		100
#13	35	39	36		84.6154		1		11.6667	62		230		140		96.2963
#14	15	32	6		58.3333		1		12.3333	73		284		133		90.9091
Naïve 9	41	43	101		58.4906		2		31	23		269		173		76.6667
Naïve 10	57	64	51		74		1		1.5	156		264		167		100
Naïve 11	34	74	97		57.1429		0		6.66667	116		265		179		96.9697
#1	20	25	5		67.7419		3		11.3333	39		288		208		28.5714
#2	8.5	48	25		70		4		18	128		289		190		75
#3	10	11	1		62.2642		3		4.33333	140		268		193		42.8571
#4	9	34	12		61.5385		4		4.66667	146		270		187		80
#5	2	10	8		53.3333		3		22.6667	34		261		192		25
#6	30	49	41		50		4		6	207		299		168		80
#15	14	10	1		14.2857		3		0.666667	170		263		200		0
#16	31	42	9		23.0769		3		7.66667	87		256		207		40
#17	9	41	1		35.1351		3		2.33333	120		264		194		88.8889
#18	20	43	5		46.6667		2		14.6667	105		244		171		76.4706
#19	13	44	14		57.7778		3		9.66667	72		244		186		84.2105
#20	15	57	25		85		3		6	71		297		140		88
									Splash Test	Splash Test
	Open Field (center)	Rearing	EPM		NOR Index		Coat State		% grooming	Latency		TST Immobility		FST Immobility		Sucrose Preference Test
Naïve	30.5455	41.2727	36.0909		70.642		0.818182		12.8636	72.8182		268.545		173.091		88.8644
GW exp	15.125	34.5	12.25		52.235		3.16667		9	109.917		270.25		186.333		59.0832
SD	14.5077	17.6414	34.1598		13.35		0.750757		8.34027	43.0577		18.2612		21.9475		15.3745
SD	8.75973	16.5227	12.315		20.1526		0.57735		6.60578	52.1928		19.003		18.9513		30.1474
SE	4.37423	5.31908	10.2996		4.02517		0.226362		2.51469	12.9824		5.50597		6.61741		4.63558
SE	2.52872	4.7697	3.55503		5.81757		0.166667		1.90693	15.0667		5.48569		5.47077		8.70281
t test	0.00376946	0.177092	0.0242712		0.00870615		4.80112e-08		0.117884	0.0381555		0.414266		0.0693762		0.00392542

## Sheet: Table 3
	O.F.	O.F.		EPM		NOR		TST		Coat State	Splash Test	Splash Test		Sucrose Pref.		FST Immobility
	Center	Rearing 5 min		open arm		Index		Immobility			% Grooming	Latency		%
# 55	55	64		40		73.3333		293		2	6	100		95.5556		174
# 56	36	61		45		69.2308		239		1	4	56		97.2973		191
# 57	55	73		76		78.5714		258		2	6.66667	55		86.6667		173
#41	4	47		4		42.8571		291		3	7.33333	91		80		155
#42	20	54		15		30		272		3	3	231		87.0968		170
#43	29	35		9		33.3333				3	9	112		68.4211		194
#44	31	61		13		52.1739		241		2	3	106		33.3333		149
#45	23	67		30		47.3684		290		3	4.33333	68		5.55556		172
#46	12	38		29		50		250		2	1.66667	290		78.9474		165
#47	29	47		41		54.5455		283		3	6.33333	53		71.4286		196
#48	18	45		20		29.7872		260		2	2	146		82.7586		141
#49	19	51		44		50		250		2	1.33333	50		33.3333		155
#50	16	28		35		50		273		3	0	300		65.3846		186
#51	17	37		20		63.3333		282		2	4	53		71.875		182
# 52	22	54		44		30.4348		280		3	4.33333	59		69.2308		194
# 53	38	29		6		66.6667		257		3	6	110		62.5		190
# 54	41	73		29		60.6061		210		4	2.66667	108		53.3333		152
	O.F.	O.F.		EPM		NOR		TST		Coat State	Splash Test	Splash Test		Sucrose Pref.		FST Immobility
	Center	Rearing 5 min		open arm		Index		Immobility			% Grooming	Latency		%
Naïve	48.6667	66		53.6667		73.7118		263.333		1.66667	5.55556	70.3333		93.1732		179.333
GW exp F	21.1429	49.8571		20.1429		44.3255		271.167		2.71429	4.95238	135.857		60.6832		171.571
GW exp M	24.4286	45.2857		28.2857		50.1183		258.857		2.71429	2.90476	118		62.6308		171.429
SD	10.9697	6.245		19.5021		4.68182		27.3922		0.57735	1.38778	25.697		5.7017		10.116
SD	10.0238	11.6394		13.372		9.44906		21.1983		0.48795	2.66964	89.214		29.9077		17.9337
SD	10.5017	15.861		13.9847		15.0516		24.6741		0.755929	2.02498	87.9413		15.7402		21.4154
SE	6.33333	3.60555		11.2596		2.70305		15.8149		0.333333	0.801234	14.8361		3.29188		5.84047
SE	3.78863	4.39929		5.05413		3.85756		8.65416		0.184428	1.00903	33.7197		11.304		6.77832
SE	3.96927	5.9949		5.28571		5.68896		9.32592		0.285714	0.765369	33.2387		5.94925		8.09426
N vs F	0.012628	0.0123273		0.0385131		0.000118555		0.345544		0.0317096	0.326694	0.0573632		0.0142355		0.20748
N vs M	0.017748	0.00907191		0.0680597		0.00294755		0.410511		0.03084	0.0279197	0.11401		0.00101497		0.22612
F vs M	0.28022	0.27509		0.143662		0.202686		0.179955		0.5	0.0659448	0.356325		0.440677		0.494713

## Sheet: Table 4
									Splash Test	Splash Test
	Open Field (center)	Rearing		EPM	NOR Index		Coat State		% grooming	latency		TST		FST		Sucrose Pref
#26	22	63		16	84.6154		4		2.33333	107		232		185		91.6667
#27	20	56		9	46.1538		2		5	87		240		172		42.8571
#28	10	51		40	71.4286		3		5.66667	142		224		154		85.7143
#29	18	58		62	59.0909		3		0.333333	168		288		168		81.25
#30	12	58			71.4286		3		3.33333	258		255		167		92.3077
#31	9	73		20	0		1		5.33333	60		218		201		97.3684
#32	43	39		19	67.6471		2		4.33333	250		292		178		65
#33	9	52		10	62.5		3		13	141		255		179		92.3077
#34	10	78		24	79.3651		2		1.66667	130		267		162		0
#35	30	35		22	60		3		11.3333	70		294		198		96.1538
#21	34	95		45	83.3333		2		14.6667	68		255		160		100
#22	13	95		48	81.25		1		2.66667	118		279		164		25
#23	16	66		20	50		1		8.66667	102		263		141		88.2353
#24	16	50		22	72.7273		2		7.66667	37		275		138		69.2308
#25	29	56		49	83.7838		2		13.3333	47		252		158		91.6667
#36	38	64		28	74.2857		1		1.66667	66		275		191		50
#37	40	71		62	86.6667		2		4.33333	104		264		179		100
#38	19	79		39	70.8333		1		4	90		279		158		92.8571
#39	42	82		39	82.0513		0		3.66667	84		273		193		83.3333
#40	26	24		36	95.4545		1		2	99		239		175		93.75
									Splash Test	Splash Test
	Open Field (center)	Rearing		EPM	NOR Index		Coat State		% grooming	latency		TST		FST		Sucrose Pref
GW exp / Veh	18.3	56.3		24.6667	60.2229		2.6		5.23333	141.3		256.5		176.4		74.4626
GW exp/ ROSI	27.3	68.2		38.8	78.0386		1.3		6.26667	81.5		265.4		165.7		79.4073
SD	11.126	13.3337		16.6808	23.8022		0.843274		4.04618	68.3895		28.2538		15.0643		31.1517
SD	10.9041	21.622		13.0196	12.2274		0.674949		4.66878	26.3238		13.3517		18.7975		24.5105
SE	3.51836	4.2165		5.27494	7.52693		0.266667		1.27952	21.6267		8.93464		4.76375		9.85103
SE	3.44819	6.83748		4.11717	3.86665		0.213437		1.4764	8.32433		4.22216		5.94428		7.7509
t test	0.0421717	0.0778997		0.0269659	0.0247831		0.000646972		0.301664	0.00942711		0.18984		0.0885747		0.348929

## Sheet: Fig 1
		NAIVE		GWE		GWE-VEH		GWE-ROSI
	1	100	0	100	0	100	0	100	0
	2	102.954	0.68734	101.437	0.6421	99.5761	0.4766	100.403	0.70023
	3	107.306	1.60418	100.122	0.52222	99.6144	0.57304	101.046	0.62196
	4	109.575	1.19732	98.641	1.20533	99.3237	0.69635	100.635	0.85041
	6	111.182	1.1895	100.802	1.41395	96.8908	1.42974	97.3515	1.45997
	7	111.879	1.51148	102.956	1.40835	99.2251	1.01177	99.5995	0.66982
	9	112.788	1.5419	103.216	1.29475	99.2977	0.91617	102.194	0.49922
	10	114.078	1.8763	103.663	1.40189	101.985	0.96918	103.235	0.40364
	13	117.206	2.90105	100.024	1.03812	98.1514	1.00189	98.2059	0.65461
	14	118.287	2.22849	99.0477	2.38955	104.023	1.24848	104.573	0.6985
	17	120.721	2.7459	104.405	1.94231	105.54	1.3061	107.169	0.86468
	19	121.11	3.30951	105.004	1.8149	97.5099	1.07484	98.4565	0.66512
	20	123.244	2.91655	102.756	1.86695	102.7	0.93409	103.453	0.67702
	21	124.8	3.78342	105.01	1.79308	102.353	0.6976	105.116	0.93168
	22	125.573	3.39168	103.52	2.26117	106.929	1.61789	107.688	1.1139
	25	124.913	3.61651	106.644	2.09253	108.508	1.06085	108.385	1.02253
	26	125.151	4.58135	107.523	2.00031	110.103	1.31464	110.365	1.15635
	28	127.172	3.99612	107.006	1.86623	110.305	0.92662	112.904	1.26735
	29	131.397	4.89308	104.873	2.17851	108.752	1.38104	109.724	1.18955
	32	132.915	4.99934	109.813	2.89284	109.205	2.27586	109.662	2.01719
	33	134.868	4.97075	112.28	2.77875	112.395	1.79576	112.461	1.60535
	35	136.735	4.94292	113.529	3.26205	116.548	2.53109	117.888	1.78253
	41	137.239	5.93842	117.883	3.28621	118.023	2.33115	120.302	1.7561

## Sheet: Fig 2 and 3
FIG 2	GFAP % ROI
HC	CTR	GWE	GWE+R	LA	CTR	GWE	GWE+R
	4	15	21		1.2	4.1	12.5		2x background
	4.1	16	31		0.2	6.7	13
	1	13	17		0.47	3.8	15.2
	5	14	22		3.5	5.6	17.4
	1.5	17	23		0.49	5.5	9.5
			--		--	--	11
	TSPO% GFAP
HC	CTR	GWE	GWE+R	LA	CTR	GWE	GWE+R
	0.1	7.4	0.9		2.8	22	4.1
	0	2.7	0.77		0.8	10	6.6
	0.25	2.6	0.84		2.5	11	4.6
	0.2	1.23	0.44			18	6
	0.12	4.1	1.4
FIG 3	Iba1 % ROI
HC	CTR	GWE	GWE+R	LA	CTR	GWE	GWE+R
	0.372	3.153	2.1		0.372	1.81	1.21
	0.124	0.245	0.9		0.124	2.13	0.58
	0.22	2.55	1.25		0.22	2.45	0.85
	0.12	4.1	1.15		0.12	1.48	0.97
	0.5	3.48	1.23		0.5	1.805	1.42
	TNF % Iba1
HC	CTR	GWE	GWE+R	LA	CTR	GWE	GWE+R
	3	20	9		3	22	8
	2.5	17	7		4	36	8.5
	0	37	6		0	22	5.2
	5	24	9		4.4	21	12.5
	3	31	10		5	22	9
